# Supplementary material for: Characterization and Comparative Analysis of RWP-RK Proteins from Arachis duranensis, Arachis ipaensis, and Arachis hypogaea
Source: Int J Genomics. 2020 Aug 27;2020:2568640. doi: 10.1155/2020/2568640 (PMC7474775; doi:10.1155/2020/2568640)
Supplement: Supplementary 2 — Table S1: primers used in this study. [file 2568640.f2.xlsx]

## Sheet: Sheet1
Supplementary Table S1. Primers used in this study
Primer codes	Forward primer sequences(5‘to3’)	Reverse primer sequences(5‘to3’)	Purposes
Aradu.YRC2R	ATAAGGCTTGTGGTGCATGA	TTGGAAACTGTCATGCTATGC	qRT-PCR
Aradu.T4VLF	GCGAGAGCTCAGGGTAGTGA	TGGGGTCATACATACCAAGGA	qRT-PCR
Araip.R44NW	GGTGCATGACACAGTTTCCA	TGAACTGATCCGAAACCACA	qRT-PCR
Araip.Y4AFN	CTTCCCATCTTGGAAGCTCA	TGGGGTCATACATACCAAGGA	qRT-PCR
Arahy.K1SYDF	GCATTGTTGAACTGCAGGAA	GTCATGCACCACAAGCCTTA	qRT-PCR
Arahy.0FWB0U	GCGAGAGCTCAGGGTAGTGA	TGGGGTCATACATACCAAGGA	qRT-PCR
Arahy.LH2L98	CTTCCCATCTTGGAAGCTCA	TGGGGTCATACATACCAAGGA	qRT-PCR
Arahy.62AJ6F	TGTGAGAGCTCTGGGAACTG	ACTGATCCGAAACCACAATCC	qRT-PCR
