# Supplementary material for: Characterization and Comparative Analysis of RWP-RK Proteins from Arachis duranensis, Arachis ipaensis, and Arachis hypogaea
Source: Int J Genomics. 2020 Aug 27;2020:2568640. doi: 10.1155/2020/2568640 (PMC7474775; doi:10.1155/2020/2568640)
Supplement: Supplementary 4 — Table S3: function analysis of the cis-acting elements in A. duranensis RWP-RK promoter regions. The classifications, names, and putative functions of related cis-acting elements are listed. [file 2568640.f4.xlsx]

## Sheet: Sheet1
Supplementary Table S3. Function analysis of the cis-acting elements in A. duranensis RWP-RK promoter regions.The classifications, names and putative functions of related cis-acting elements are listed.
Classification of cis-elements	Name of cis-elements	Functions of the cis-elements	Genes
development-related elements	CAT-box	cis-acting regulatory element related to meristem expression	Aradu.YRC2R,Aradu.H6JXR,Aradu.T4VLF,Aradu.R5YE9,Aradu.7K2S3
development-related elements	GCN4_motif	cis-regulatory element involved in endosperm expression	Aradu.0768L,Aradu.1V6B6,Aradu.N7C89
development-related elements	O2-site	cis-acting regulatory element involved in zein metabolism regulation	Aradu.H6JXR,Aradu.TED1R,Aradu.G4SB3,Aradu.BBG0S,Aradu.46M2Y
development-related elements	circadian	cis-acting regulatory element involved in circadian control	Aradu.YRC2R
development-related elements	HD-Zip 1	element involved in differentiation of the palisade mesophyll cells	Aradu.W5BH1
development-related elements	MSA-like	cis-acting element involved in cell cycle regulation	Aradu.W5BH1
environmental stress-related elements	MBS	MYB binding site involved in drought-inducibility	Aradu.YRC2R,Aradu.H6JXR,Aradu.T4VLF,Aradu.TED1R,Aradu.G4SB3,Aradu.BBG0S,Aradu.46M2Y,Aradu.7K2S3
environmental stress-related elements	ARE	cis-acting regulatory element essential for the anaerobic induction	Aradu.YRC2R,Aradu.H6JXR,Aradu.W5BH1,Aradu.TG0QF,Aradu.G4SB3,Aradu.BBG0S,Aradu.0768L,Aradu.1V6B6,Aradu.32F23,Aradu.7K2S3
environmental stress-related elements	TC-rich repeats	cis-acting element involved in defense and stress responsiveness	Aradu.H6JXR,Aradu.TED1R,Aradu.BBG0S,Aradu.0768L,Aradu.7K2S3
environmental stress-related elements	LTR	cis-acting element involved in low-temperature responsiveness	Aradu.0768L,Aradu.32F23,Aradu.H6JXR,Aradu.R5YE9,Aradu.TG0QF
hormone-responsive elements	ABRE	cis-acting element involved in the abscisic acid responsiveness	Aradu.YRC2R,Aradu.H6JXR,Aradu.T4VLF,Aradu.W5BH1,Aradu.TED1R,Aradu.0768L,Aradu.1V6B6,Aradu.46M2Y,Aradu.N7C89
hormone-responsive elements	AuxRR-core	cis-acting regulatory element involved in auxin responsiveness	Aradu.T4VLF
hormone-responsive elements	CGTCA-motif	cis-acting regulatory element involved in the MeJA-responsiveness	Aradu.YRC2R,Aradu.H6JXR,Aradu.T4VLF,Aradu.R5YE9,Aradu.G4SB3,Aradu.BBG0S,Aradu.0768L,Aradu.1V6B6,Aradu.N7C89
hormone-responsive elements	TGACG-motif	cis-acting regulatory element involved in the MeJA-responsiveness	Aradu.YRC2R,Aradu.H6JXR,Aradu.T4VLF,Aradu.R5YE9,Aradu.G4SB3,Aradu.BBG0S,Aradu.0768L,Aradu.1V6B6,Aradu.N7C89
hormone-responsive elements	TCA-element	auxin-responsive element	Aradu.YRC2R,Aradu.TED1R,Aradu.TG0QF,Aradu.BBG0S,Aradu.32F23,Aradu.7K2S3,Aradu.N7C89
hormone-responsive elements	TGA-element	auxin-responsive element	Aradu.H6JXR,Aradu.TG0QF,Aradu.1V6B6
hormone-responsive elements	P-box	gibberellin-responsive element	Aradu.46M2Y,Aradu.7K2S3
hormone-responsive elements	TATC-box	cis-acting element involved in gibberellin-responsiveness	Aradu.G4SB3,Aradu.BBG0S,Aradu.1V6B6
light-responsive elements	AE-box	part of a module for light response	Aradu.YRC2R,Aradu.H6JXR,Aradu.T4VLF,Aradu.R5YE9,Aradu.TG0QF,Aradu.BBG0S,Aradu.7K2S3
light-responsive elements	Box 4	part of a conserved DNA module involved in light responsiveness	Aradu.YRC2R,Aradu.H6JXR,Aradu.T4VLF,Aradu.W5BH1,Aradu.TED1R,Aradu.R5YE9,Aradu.TG0QF,Aradu.G4SB3,Aradu.BBG0S,Aradu.0768L,Aradu.1V6B6,Aradu.32F23,Aradu.46M2Y,Aradu.N7C89
light-responsive elements	Box II	part of a light responsive element	Aradu.H6JXR,Aradu.T4VLF,Aradu.46M2Y
light-responsive elements	G-Box	cis-acting regulatory element involved in light responsiveness	Aradu.YRC2R,Aradu.H6JXR,Aradu.T4VLF,Aradu.TED1R,Aradu.TG0QF,Aradu.1V6B6,Aradu.46M2Y,,Aradu.YRC2R,Aradu.T4VLF,Aradu.W5BH1,Aradu.0768L,Aradu.1V6B6,Aradu.32F23
light-responsive elements	G-box	cis-acting regulatory element involved in light responsiveness	Aradu.YRC2R,Aradu.H6JXR,Aradu.T4VLF,Aradu.TED1R,Aradu.TG0QF,Aradu.1V6B6,Aradu.46M2Y,Aradu.32F23,Aradu.N7C89
light-responsive elements	GT1-motif	light responsive element	Aradu.YRC2R,Aradu.T4VLF,Aradu.W5BH1,Aradu.TED1R,Aradu.R5YE9,Aradu.G4SB3,Aradu.BBG0S,Aradu.32F23,Aradu.1V6B6
light-responsive elements	chs-CMA1a	part of a light responsive element	Aradu.H6JXR,Aradu.T4VLF,Aradu.0768L
light-responsive elements	AT1-motif	Solanum tuberosum part of a light responsive module	Aradu.0768L,Aradu.46M2Y,Aradu.TED1R,Aradu.TED1R,Aradu.N7C89
light-responsive elements	TCT-motif	part of a light responsive element	Aradu.YRC2R,Aradu.W5BH1,Aradu.TED1R,Aradu.G4SB3,Aradu.BBG0S,Aradu.0768L,Aradu.1V6B6,Aradu.32F23,Aradu.46M2Y,Aradu.7K2S3,Aradu.N7C89
light-responsive elements	CAG-motif	part of a light response element	Aradu.0768L
light-responsive elements	I-box	part of a light responsive element	Aradu.0768L,Aradu.1V6B6,Aradu.TG0QF,Aradu.BBG0S
light-responsive elements	LAMP-element	part of a light responsive element	Aradu.YRC2R,Aradu.1V6B6
light-responsive elements	MRE	MYB binding site involved in light responsiveness	Aradu.W5BH1,Aradu.G4SB3,Aradu.1V6B6,Aradu.32F23,Aradu.0768L
light-responsive elements	TCCC-motif	part of a light responsive element	Aradu.0768L,Aradu.32F23,Aradu.W5BH1
light-responsive elements	ATC-motif	part of a conserved DNA module involved in light responsiveness	Aradu.H6JXR,Aradu.R5YE9,Aradu.46M2Y,Aradu.N7C89
light-responsive elements	GATA-motif	part of a light responsive element	Aradu.H6JXR,Aradu.W5BH1,Aradu.TG0QF,Aradu.0768L,Aradu.1V6B6,Aradu.32F23,Aradu.7K2S3
light-responsive elements	chs-CMA2a	part of a light responsive element	Aradu.H6JXR
light-responsive elements	ACE	cis-acting element involved in light responsiveness	Aradu.W5BH1,Aradu.1V6B6,Aradu.7K2S3
light-responsive elements	GA-motif	part of a light responsive element	Aradu.R5YE9
light-responsive elements	Gap-box	part of a light responsive element	Aradu.YRC2R,Aradu.W5BH1,Aradu.7K2S3
light-responsive elements	ATCT-motif	part of a conserved DNA module involved in light responsiveness	Aradu.H6JXR,Aradu.W5BH1,Aradu.TG0QF,Aradu.0768L,Aradu.1V6B6
light-responsive elements	Sp1	light responsive element	Aradu.TG0QF
light-responsive elements	AAAC-motif	light responsive element	Aradu.BBG0S
light-responsive elements	chs-Unit 1 m1	part of a light responsive element	Aradu.46M2Y
light-responsive elements	GTGGC-motif	part of a light response element	Aradu.46M2Y
promoter-related elements	AT-rich sequence	element for maximal elicitor-mediated activation (2copies)	Aradu.T4VLF
promoter-related elements	CAAT-box	common cis-acting element in promoter and enhancer regions	Aradu.YRC2R,Aradu.H6JXR,Aradu.T4VLF,Aradu.W5BH1,Aradu.TED1R,Aradu.R5YE9,Aradu.TG0QF,Aradu.G4SB3,Aradu.BBG0S,Aradu.0768L,Aradu.1V6B6,Aradu.32F23,Aradu.46M2Y,Aradu.7K2S3,Aradu.N7C89
promoter-related elements	TATA-box	core promoter element around -30 of transcription start	Aradu.YRC2R,Aradu.H6JXR,Aradu.T4VLF,Aradu.W5BH1,Aradu.TED1R,Aradu.R5YE9,Aradu.TG0QF,Aradu.G4SB3,Aradu.BBG0S,Aradu.0768L,Aradu.1V6B6,Aradu.32F23,Aradu.46M2Y,Aradu.7K2S3,Aradu.N7C89
promoter-related elements	A-box	cis-acting regulatory element	Aradu.YRC2R
site-binding related elements	CCAAT-box	MYBHv1 binding site	Aradu.W5BH1,Aradu.BBG0S,Aradu.0768L,Aradu.1V6B6,Aradu.46M2Y,Aradu.7K2S3,
site-binding related elements	MBSI	MYB binding site involved in flavonoid biosynthetic genes regulation	Aradu.W5BH1,Aradu.BBG0S
site-binding related elements	AT-rich element	binding site of AT-rich DNA binding protein (ATBP-1)	Aradu.H6JXR
site-binding related elements	Box III	protein binding site	Aradu.32F23
site-binding related elements	3-AF3 binding site	part of a conserved DNA module array (CMA3)	Aradu.32F23,Aradu.7K2S3
other elements	/	uknown	Aradu.YRC2R,Aradu.H6JXR,Aradu.T4VLF,Aradu.W5BH1,Aradu.TED1R,Aradu.R5YE9,Aradu.TG0QF,Aradu.G4SB3,Aradu.BBG0S,Aradu.0768L,Aradu.1V6B6,Aradu.32F23,Aradu.46M2Y,Aradu.7K2S3,Aradu.N7C89
other elements	AAGAA-motif	uknown	Aradu.YRC2R,Aradu.H6JXR,Aradu.T4VLF,Aradu.W5BH1,Aradu.R5YE9,Aradu.TG0QF,Aradu.G4SB3,Aradu.BBG0S,Aradu.0768L,Aradu.46M2Y,Aradu.7K2S3,Aradu.N7C89
other elements	AT~TATA-box	uknown	Aradu.YRC2R,Aradu.H6JXR,Aradu.T4VLF,Aradu.W5BH1,Aradu.TED1R,Aradu.R5YE9,Aradu.G4SB3,Aradu.BBG0S,Aradu.0768L,Aradu.1V6B6,Aradu.32F23,Aradu.46M2Y,Aradu.7K2S3,Aradu.N7C89
other elements	ERE	uknown	Aradu.YRC2R,Aradu.H6JXR,Aradu.T4VLF,Aradu.W5BH1,Aradu.TED1R,Aradu.R5YE9,Aradu.TG0QF,Aradu.G4SB3,Aradu.BBG0S,Aradu.0768L,Aradu.32F23,Aradu.46M2Y,Aradu.N7C89
other elements	MYB	uknown	Aradu.32F23,Aradu.46M2Y,Aradu.7K2S3,Aradu.H6JXR,Aradu.T4VLF,Aradu.W5BH1,Aradu.TED1R,Aradu.TG0QF,Aradu.G4SB3,Aradu.BBG0S,Aradu.0768L,Aradu.1V6B6,Aradu.N7C89
other elements	MYC	uknown	Aradu.YRC2R,Aradu.H6JXR,Aradu.T4VLF,Aradu.W5BH1,Aradu.TED1R,Aradu.R5YE9,Aradu.TG0QF,Aradu.G4SB3,Aradu.BBG0S,Aradu.0768L,Aradu.1V6B6,Aradu.32F23,Aradu.46M2Y,Aradu.7K2S3,Aradu.N7C89
other elements	Myb	uknown	Aradu.YRC2R,Aradu.H6JXR,Aradu.T4VLF,Aradu.TED1R,Aradu.R5YE9,Aradu.G4SB3,Aradu.BBG0S,Aradu.32F23,Aradu.46M2Y,Aradu.7K2S3,Aradu.0768L,Aradu.N7C89
other elements	TCA	uknown	Aradu.46M2Y,Aradu.T4VLF,Aradu.R5YE9,Aradu.BBG0S,Aradu.N7C89
other elements	Unnamed__4	uknown	Aradu.YRC2R,Aradu.H6JXR,Aradu.T4VLF,Aradu.W5BH1,Aradu.TED1R,Aradu.R5YE9,Aradu.TG0QF,Aradu.G4SB3,Aradu.BBG0S,Aradu.0768L,Aradu.1V6B6,Aradu.32F23,Aradu.46M2Y,Aradu.7K2S3,Aradu.N7C89
other elements	W box	uknown	Aradu.H6JXR,Aradu.T4VLF,Aradu.W5BH1,Aradu.32F23,Aradu.46M2Y,Aradu.7K2S3,Aradu.1V6B6
other elements	as-1	uknown	Aradu.YRC2R,Aradu.H6JXR,Aradu.T4VLF,Aradu.R5YE9,Aradu.G4SB3,Aradu.BBG0S,Aradu.0768L,Aradu.1V6B6,Aradu.N7C89
other elements	AC-II	uknown	Aradu.TED1R
other elements	AP-1	uknown	Aradu.YRC2R,Aradu.TED1R
other elements	MYB recognition site	uknown	Aradu.W5BH1,Aradu.BBG0S,Aradu.0768L,Aradu.1V6B6,Aradu.7K2S3,Aradu.46M2Y
other elements	MYB-like sequence	uknown	Aradu.TG0QF,Aradu.G4SB3,Aradu.BBG0S,Aradu.0768L,Aradu.1V6B6,Aradu.32F23,Aradu.7K2S3,Aradu.H6JXR,Aradu.TED1R
other elements	Myb-binding site	uknown	Aradu.1V6B6,Aradu.7K2S3,Aradu.H6JXR,Aradu.W5BH1,Aradu.TED1R,Aradu.N7C89
other elements	TATA	uknown	Aradu.YRC2R,Aradu.H6JXR,Aradu.R5YE9,Aradu.G4SB3,Aradu.BBG0S,Aradu.0768L,Aradu.32F23,Aradu.N7C89
other elements	WRE3	uknown	Aradu.H6JXR,Aradu.TED1R,Aradu.TG0QF,Aradu.G4SB3,Aradu.BBG0S,Aradu.1V6B6,Aradu.46M2Y,Aradu.7K2S3,Aradu.N7C89
other elements	WUN-motif	uknown	Aradu.H6JXR,Aradu.TG0QF,Aradu.7K2S3,Aradu.32F23,Aradu.1V6B6,Aradu.0768L
other elements	ABRE3a	uknown	Aradu.H6JXR,Aradu.TED1R,Aradu.1V6B6,Aradu.46M2Y
other elements	ABRE4	uknown	Aradu.H6JXR,Aradu.TED1R,Aradu.1V6B6,Aradu.46M2Y
other elements	STRE	uknown	Aradu.YRC2R,Aradu.H6JXR,Aradu.TG0QF,Aradu.32F23,Aradu.46M2Y,Aradu.7K2S3,Aradu.N7C89
other elements	Unnamed__1	uknown	Aradu.H6JXR,Aradu.TG0QF,Aradu.0768L,Aradu.32F23,Aradu.46M2Y,Aradu.N7C89
other elements	Unnamed__2	uknown	Aradu.TG0QF,Aradu.46M2Y
other elements	Unnamed__6	uknown	Aradu.G4SB3,Aradu.BBG0S,Aradu.0768L,Aradu.32F23,Aradu.46M2Y,Aradu.N7C89
other elements	box S	uknown	Aradu.H6JXR
other elements	CARE	uknown	Aradu.H6JXR,Aradu.W5BH1,Aradu.1V6B6
other elements	DRE core	uknown	Aradu.H6JXR
other elements	Myc	uknown	Aradu.32F23,Aradu.32F23,Aradu.H6JXR,Aradu.W5BH1,Aradu.N7C89
other elements	CTAG-motif	uknown	Aradu.7K2S3
other elements	AC-I	uknown	Aradu.1V6B6
other elements	DRE1	uknown	Aradu.TG0QF
other elements	NON	uknown	Aradu.TG0QF,Aradu.1V6B6
other elements	CCGTCC motif	uknown	Aradu.YRC2R
other elements	CCGTCC-box	uknown	Aradu.YRC2R
