# Supplementary material for: Characterization and Comparative Analysis of RWP-RK Proteins from Arachis duranensis, Arachis ipaensis, and Arachis hypogaea
Source: Int J Genomics. 2020 Aug 27;2020:2568640. doi: 10.1155/2020/2568640 (PMC7474775; doi:10.1155/2020/2568640)
Supplement: Supplementary 5 — Table S4: function analysis of the cis-acting elements in A. ipaensis RWP-RK promoter regions. The classifications, names, and putative functions of related cis-acting elements are listed. [file 2568640.f5.xlsx]

## Sheet: Sheet1
Supplementary Table S4. Function analysis of the cis-acting elements in A. ipaensis RWP-RK promoter regions.The classifications, names and putative functions of related cis-acting elements are listed.
Classification of cis-elements	Name of cis-elements	Functions of the cis-elements	Genes
development-related elements	CAT-box	cis-acting regulatory element related to meristem expression	Araip.RLH2R,Araip.KR88K,Araip.377BK,Araip.YWB61,Araip.Y4AFN,Araip.X4GVE,Araip.W1UKI
development-related elements	GCN4_motif	cis-regulatory element involved in endosperm expression	Araip.P1CBC,Araip.377BK,Araip.YB35N
development-related elements	O2-site	cis-acting regulatory element involved in zein metabolism regulation	Araip.RLH2R,Araip.P1CBC,Araip.KR88K,Araip.73BCB,Araip.5C6JK,Araip.38X68,Araip.YWB61,Araip.YB35N,Araip.5012K
development-related elements	circadian	cis-acting regulatory element involved in circadian control	Araip.5C6JK,Araip.YB35N
development-related elements	HD-Zip 1	element involved in differentiation of the palisade mesophyll cells	Araip.J80SY
development-related elements	MSA-like	cis-acting element involved in cell cycle regulation	Araip.P1CBC,Araip.J80SY
development-related elements	AACA_motif	involved in endosperm-specific negative expression	Araip.80XBW
development-related elements	motif I	cis-acting regulatory element root specific	Araip.80XBW
development-related elements	RY-element	cis-acting regulatory element involved in seed-specific regulation	Araip.X4GVE
environmental stress-related elements	MBS	MYB binding site involved in drought-inducibility	Araip.RLH2R,Araip.R44NW,Araip.P1CBC,Araip.KR88K,Araip.GND3E,Araip.80XBW,Araip.73BCB,Araip.5C6JK,Araip.38X68,Araip.YB35N,Araip.Y4AFN,Araip.X4GVE,Araip.W1UKI
environmental stress-related elements	ARE	cis-acting regulatory element essential for the anaerobic induction	Araip.VC558,Araip.RLH2R,Araip.R44NW,Araip.P1CBC,Araip.KR88K,Araip.GND3E,Araip.5012K,Araip.80XBW,Araip.73BCB,Araip.377BK,Araip.YB35N
environmental stress-related elements	TC-rich repeats	cis-acting element involved in defense and stress responsiveness	Araip.VC558,Araip.RLH2R,Araip.P1CBC,Araip.KR88K,Araip.GND3E,Araip.73BCB,Araip.5C6JK,Araip.YWB61,Araip.YB35N
environmental stress-related elements	GC-motif	enhancer-like element involved in anoxic specific inducibility	Araip.80XBW
environmental stress-related elements	LTR	cis-acting element involved in low-temperature responsiveness	Araip.VC558,Araip.RLH2R,Araip.R44NW,Araip.YWB61,Araip.5012K
hormone-responsive elements	ABRE	cis-acting element involved in the abscisic acid responsiveness	Araip.VC558,Araip.RLH2R,Araip.KR88K,Araip.J80SY,Araip.80XBW,Araip.73BCB,Araip.5012K,Araip.5C6JK,Araip.38X68,Araip.377BK,Araip.Y4AFN,Araip.X4GVE,Araip.W1UKI
hormone-responsive elements	AuxRR-core	cis-acting regulatory element involved in auxin responsiveness	Araip.P1CBC,Araip.KR88K,Araip.377BK,Araip.Y4AFN
hormone-responsive elements	CGTCA-motif	cis-acting regulatory element involved in the MeJA-responsiveness	Araip.VC558,Araip.R44NW,Araip.KR88K,Araip.5C6JK,Araip.YWB61,Araip.YB35N,Araip.Y4AFN,Araip.W1UKI,Araip.5012K
hormone-responsive elements	TGACG-motif	cis-acting regulatory element involved in the MeJA-responsiveness	Araip.VC558,Araip.RLH2R,Araip.R44NW,Araip.KR88K,Araip.5C6JK,Araip.YWB61,Araip.YB35N,Araip.Y4AFN,Araip.W1UKI,Araip.5012K
hormone-responsive elements	TCA-element	auxin-responsive element	Araip.RLH2R,Araip.R44NW,Araip.73BCB,Araip.5C6JK,Araip.YWB61,Araip.YB35N
hormone-responsive elements	GARE-motif	gibberellin-responsive element	Araip.80XBW
hormone-responsive elements	TGA-element	auxin-responsive element	Araip.R44NW,Araip.KR88K,Araip.X4GVE
hormone-responsive elements	P-box	gibberellin-responsive element	Araip.5012K,Araip.38X68,Araip.377BK
light-responsive elements	AE-box	part of a module for light response	Araip.RLH2R,Araip.J80SY,Araip.GND3E,Araip.5C6JK,Araip.Y4AFN
light-responsive elements	Box 4	part of a conserved DNA module involved in light responsiveness	Araip.5012K,Araip.VC558,Araip.RLH2R,Araip.R44NW,Araip.KR88K,Araip.J80SY,Araip.GND3E,Araip.80XBW,Araip.73BCB,Araip.5C6JK,Araip.38X68,Araip.YWB61,Araip.YB35N,Araip.Y4AFN,Araip.X4GVE,Araip.W1UKI
light-responsive elements	Box II	part of a light responsive element	Araip.RLH2R,Araip.GND3E,Araip.38X68,Araip.Y4AFN
light-responsive elements	G-Box	cis-acting regulatory element involved in light responsiveness	Araip.5012K,Araip.VC558,Araip.J80SY,Araip.5C6JK,,Araip.Y4AFN,Araip.RLH2R,Araip.P1CBC,Araip.KR88K,Araip.80XBW,Araip.73BCB,Araip.5C6JK,Araip.38X68,Araip.377BK,Araip.Y4AFN,Araip.X4GVE,Araip.W1UKI
light-responsive elements	G-box	cis-acting regulatory element involved in light responsiveness	Araip.RLH2R,Araip.P1CBC,Araip.KR88K,Araip.80XBW,Araip.73BCB,Araip.5C6JK,Araip.38X68,Araip.377BK,Araip.Y4AFN,Araip.X4GVE,Araip.W1UKI,Araip.5012K
light-responsive elements	GT1-motif	light responsive element	Araip.VC558,Araip.RLH2R,Araip.R44NW,Araip.P1CBC,Araip.J80SY,Araip.5012K,Araip.80XBW,Araip.73BCB,Araip.5C6JK,Araip.YB35N,Araip.X4GVE
light-responsive elements	chs-CMA1a	part of a light responsive element	Araip.RLH2R,Araip.R44NW,Araip.KR88K,Araip.377BK,Araip.X4GVE
light-responsive elements	AT1-motif	Solanum tuberosum part of a light responsive module	Araip.RLH2R,Araip.KR88K,Araip.80XBW,Araip.377BK,Araip.YB35N,Araip.X4GVE,Araip.5012K
light-responsive elements	TCT-motif	part of a light responsive element	Araip.RLH2R,Araip.J80SY,Araip.GND3E,Araip.80XBW,Araip.73BCB,Araip.5C6JK,Araip.YWB61,Araip.YB35N
light-responsive elements	I-box	part of a light responsive element	Araip.VC558,Araip.KR88K,Araip.X4GVE
light-responsive elements	LAMP-element	part of a light responsive element	Araip.R44NW,Araip.X4GVE,Araip.W1UKI
light-responsive elements	MRE	MYB binding site involved in light responsiveness	Araip.R44NW,Araip.80XBW,Araip.377BK,Araip.W1UKI
light-responsive elements	TCCC-motif	part of a light responsive element	Araip.KR88K,Araip.GND3E,Araip.W1UKI,Araip.5012K
light-responsive elements	ATC-motif	part of a conserved DNA module involved in light responsiveness	Araip.RLH2R,Araip.P1CBC,Araip.KR88K,Araip.38X68,Araip.377BK
light-responsive elements	GATA-motif	part of a light responsive element	Araip.VC558,Araip.RLH2R,Araip.R44NW,Araip.KR88K,Araip.GND3E,Araip.80XBW,Araip.377BK,Araip.5012K
light-responsive elements	chs-CMA2a	part of a light responsive element	Araip.RLH2R
light-responsive elements	ACE	cis-acting element involved in light responsiveness	Araip.GND3E
light-responsive elements	GA-motif	part of a light responsive element	Araip.GND3E,Araip.80XBW,Araip.YWB61,Araip.X4GVE
light-responsive elements	Gap-box	part of a light responsive element	Araip.GND3E
light-responsive elements	ATCT-motif	part of a conserved DNA module involved in light responsiveness	Araip.KR88K,Araip.73BCB,Araip.5012K
light-responsive elements	ACA-motif	part of gapA in (gapA-CMA1) involved with light responsiveness	Araip.YWB61
light-responsive elements	Sp1	light responsive element	Araip.377BK
light-responsive elements	AAAC-motif	light responsive element	Araip.80XBW
light-responsive elements	chs-Unit 1 m1	part of a light responsive element	Araip.38X68
promoter-related elements	AT-rich sequence	element for maximal elicitor-mediated activation (2copies)	Araip.Y4AFN,Araip.X4GVE
promoter-related elements	CAAT-box	common cis-acting element in promoter and enhancer regions	Araip.5012K,Araip.VC558,Araip.RLH2R,Araip.R44NW,Araip.P1CBC,Araip.KR88K,Araip.J80SY,Araip.GND3E,Araip.80XBW,Araip.73BCB,Araip.5C6JK,Araip.38X68,Araip.377BK,Araip.YWB61,Araip.YB35N,Araip.Y4AFN,Araip.X4GVE,Araip.W1UKI
promoter-related elements	TATA-box	core promoter element around -30 of transcription start	Araip.VC558,Araip.RLH2R,Araip.R44NW,Araip.P1CBC,Araip.KR88K,Araip.J80SY,Araip.GND3E,Araip.80XBW,Araip.73BCB,Araip.5C6JK,Araip.5012K,Araip.38X68,Araip.377BK,Araip.YWB61,Araip.YB35N,Araip.Y4AFN,Araip.X4GVE,Araip.W1UKI
promoter-related elements	A-box	cis-acting regulatory element	Araip.YWB61
site-binding related elements	CCAAT-box	MYBHv1 binding site	Araip.J80SY,Araip.73BCB,Araip.YB35N,Araip.X4GVE
site-binding related elements	MBSI	MYB binding site involved in flavonoid biosynthetic genes regulation	Araip.J80SY,Araip.80XBW
site-binding related elements	AT-rich element	binding site of AT-rich DNA binding protein (ATBP-1)	Araip.RLH2R,Araip.P1CBC,Araip.80XBW,Araip.377BK
site-binding related elements	HD-Zip 3	protein binding site	Araip.X4GVE
site-binding related elements	3-AF3 binding site	part of a conserved DNA module array (CMA3)	Araip.80XBW
other elements	/	uknown	Araip.VC558,Araip.RLH2R,Araip.R44NW,Araip.P1CBC,Araip.KR88K,Araip.J80SY,Araip.GND3E,Araip.80XBW,Araip.73BCB,Araip.5C6JK,Araip.5012K,Araip.38X68,Araip.377BK,Araip.YWB61,Araip.YB35N,Araip.Y4AFN,Araip.X4GVE,Araip.W1UKI
other elements	AAGAA-motif	uknown	Araip.VC558,Araip.RLH2R,Araip.R44NW,Araip.KR88K,Araip.GND3E,Araip.38X68,Araip.5012K,Araip.377BK,Araip.YWB61,Araip.Y4AFN,Araip.X4GVE
other elements	AT~TATA-box	uknown	Araip.VC558,Araip.RLH2R,Araip.R44NW,Araip.P1CBC,Araip.KR88K,Araip.J80SY,Araip.GND3E,Araip.73BCB,Araip.5C6JK,Araip.38X68,Araip.377BK,Araip.YWB61,Araip.YB35N,Araip.Y4AFN,Araip.X4GVE,Araip.W1UKI
other elements	ERE	uknown	Araip.VC558,Araip.RLH2R,Araip.R44NW,Araip.P1CBC,Araip.KR88K,Araip.J80SY,Araip.73BCB,Araip.5C6JK,Araip.YWB61,Araip.YB35N,Araip.X4GVE,Araip.W1UKI
other elements	MYB	uknown	Araip.VC558,Araip.RLH2R,Araip.R44NW,Araip.P1CBC,Araip.KR88K,Araip.J80SY,Araip.GND3E,Araip.80XBW,Araip.73BCB,Araip.5C6JK,Araip.38X68,Araip.377BK,Araip.YWB61,Araip.YB35N,Araip.Y4AFN,Araip.X4GVE,Araip.W1UKI,Araip.5012K
other elements	MYC	uknown	Araip.VC558,Araip.RLH2R,Araip.R44NW,Araip.P1CBC,Araip.KR88K,Araip.J80SY,Araip.GND3E,Araip.80XBW,Araip.73BCB,Araip.5C6JK,Araip.5012K,Araip.38X68,Araip.377BK,Araip.YB35N,Araip.X4GVE,Araip.W1UKI
other elements	Myb	uknown	Araip.RLH2R,Araip.R44NW,Araip.P1CBC,Araip.KR88K,Araip.GND3E,Araip.80XBW,Araip.73BCB,Araip.5C6JK,Araip.38X68,Araip.YWB61,Araip.YB35N,Araip.Y4AFN,Araip.X4GVE,Araip.W1UKI,Araip.5012K
other elements	TCA	uknown	Araip.38X68,Araip.YWB61,Araip.Y4AFN,Araip.X4GVE,Araip.W1UKI
other elements	Unnamed__4	uknown	Araip.VC558,Araip.RLH2R,Araip.R44NW,Araip.P1CBC,Araip.KR88K,Araip.J80SY,Araip.GND3E,Araip.80XBW,Araip.73BCB,Araip.5C6JK,Araip.38X68,Araip.377BK,Araip.YWB61,Araip.YB35N,Araip.Y4AFN,Araip.X4GVE,Araip.W1UKI,Araip.5012K
other elements	W box	uknown	Araip.RLH2R,Araip.P1CBC,Araip.J80SY,Araip.GND3E,Araip.80XBW,Araip.38X68,Araip.YWB61,Araip.YB35N,Araip.Y4AFN,Araip.5012K
other elements	as-1	uknown	Araip.VC558,Araip.RLH2R,Araip.R44NW,Araip.KR88K,Araip.5C6JK,Araip.YWB61,Araip.YB35N,Araip.Y4AFN,Araip.W1UKI,Araip.5012K
other elements	AC-II	uknown	Araip.P1CBC,Araip.73BCB,Araip.YB35N
other elements	AP-1	uknown	Araip.R44NW,Araip.P1CBC,Araip.J80SY,Araip.73BCB,Araip.5C6JK,Araip.YB35N
other elements	MYB recognition site	uknown	Araip.J80SY,Araip.73BCB,Araip.YB35N,Araip.X4GVE
other elements	MYB-like sequence	uknown	Araip.VC558,Araip.RLH2R,Araip.R44NW,Araip.P1CBC,Araip.J80SY,Araip.80XBW,Araip.73BCB,Araip.5C6JK,Araip.377BK,Araip.YWB61,Araip.YB35N,Araip.X4GVE
other elements	Myb-binding site	uknown	Araip.RLH2R,Araip.P1CBC,Araip.80XBW,Araip.73BCB,Araip.5C6JK,Araip.YB35N,Araip.W1UKI
other elements	TATA	uknown	Araip.VC558,Araip.RLH2R,Araip.P1CBC,Araip.KR88K,Araip.80XBW,Araip.73BCB,Araip.5C6JK,Araip.377BK,Araip.YB35N,Araip.X4GVE,Araip.5012K
other elements	WRE3	uknown	Araip.RLH2R,Araip.R44NW,Araip.GND3E,Araip.73BCB,Araip.5C6JK,Araip.38X68,Araip.YWB61,Araip.YB35N,Araip.5012K
other elements	WUN-motif	uknown	Araip.VC558,Araip.RLH2R,Araip.P1CBC,Araip.KR88K,Araip.J80SY,Araip.GND3E,Araip.80XBW,Araip.73BCB,Araip.5012K,Araip.377BK,Araip.YWB61,Araip.YB35N
other elements	ABRE3a	uknown	Araip.RLH2R,Araip.80XBW,Araip.73BCB,Araip.38X68,Araip.X4GVE
other elements	ABRE4	uknown	Araip.RLH2R,Araip.80XBW,Araip.73BCB,Araip.38X68,Araip.X4GVE
other elements	F-box	uknown	Araip.P1CBC,Araip.J80SY,Araip.Y4AFN
other elements	STRE	uknown	Araip.RLH2R,Araip.R44NW,Araip.KR88K,Araip.J80SY,Araip.GND3E,Araip.80XBW,Araip.38X68
other elements	Unnamed__1	uknown	Araip.VC558,Araip.RLH2R,Araip.R44NW,Araip.P1CBC,Araip.KR88K,Araip.J80SY,Araip.80XBW,Araip.5C6JK,Araip.38X68,Araip.377BK,Araip.YWB61
other elements	Unnamed__2	uknown	Araip.38X68
other elements	Unnamed__6	uknown	Araip.38X68
other elements	box S	uknown	Araip.RLH2R
other elements	CARE	uknown	Araip.RLH2R,Araip.X4GVE
other elements	DRE core	uknown	Araip.RLH2R
other elements	Myc	uknown	Araip.VC558 ,Araip.RLH2R,Araip.38X68
other elements	CTAG-motif	uknown	Araip.80XBW
other elements	NON	uknown	Araip.X4GVE
other elements	CCGTCC motif	uknown	Araip.YWB61
other elements	CCGTCC-box	uknown	Araip.YWB61
