# Supplementary material for: Characterization and Comparative Analysis of RWP-RK Proteins from Arachis duranensis, Arachis ipaensis, and Arachis hypogaea
Source: Int J Genomics. 2020 Aug 27;2020:2568640. doi: 10.1155/2020/2568640 (PMC7474775; doi:10.1155/2020/2568640)
Supplement: Supplementary 6 — Table S5: function analysis of the cis-acting elements in A. hypogaea RWP-RK promoter regions. The classifications, names, and putative functions of related cis-acting elements are listed. [file 2568640.f6.xlsx]

## Sheet: Sheet1
Supplementary Table S5. Function analysis of the cis-acting elements in A. hypogaea RWP-RK promoter regions.The classifications, names and putative functions of related cis-acting elements are listed.
Classification of cis-elements	Name of cis-elements	Functions of the cis-elements	Genes
development-related elements	CAT-box	cis-acting regulatory element related to meristem expression	Arahy.0FWB0U,Arahy.62AJ6F,Arahy.657RUG,Arahy.DEK8Z8,Arahy.K1SYDF,Arahy.L1HKPT,Arahy.LH2L98,Arahy.XY5KEE
development-related elements	GCN4_motif	cis-regulatory element involved in endosperm expression	Arahy.1E9R5B,Arahy.552ZQ0,Arahy.EX05TD,Arahy.G1MIMQ,Arahy.JXS3UT,Arahy.P8HI4P,Arahy.WBWR58
development-related elements	O2-site	cis-acting regulatory element involved in zein metabolism regulation	Arahy.1E9R5B,Arahy.2T470H,Arahy.632XZS,Arahy.657RUG,Arahy.B1BL2B,Arahy.DD2ABE,Arahy.DEK8Z8,Arahy.DJ079B,Arahy.EX05TD,Arahy.I65W25,Arahy.V4BGUX,Arahy.X9RD42,Arahy.Y03563
development-related elements	circadian	cis-acting regulatory element involved in circadian control	Arahy.1E9R5B,Arahy.X9RD42
development-related elements	HD-Zip 1	element involved in differentiation of the palisade mesophyll cells	Arahy.50HX4L,Arahy.552ZQ0,Arahy.R4HSFZ
development-related elements	MSA-like	cis-acting element involved in cell cycle regulation	Arahy.50HX4L,Arahy.EX05TD,Arahy.R4HSFZ
development-related elements	AACA_motif	involved in endosperm-specific negative expression	Arahy.G1MIMQ,Arahy.JXS3UT
development-related elements	RY-element	cis-acting regulatory element involved in seed-specific regulation	Arahy.IZ1X2W
environmental stress-related elements	MBS	MYB binding site involved in drought-inducibility	Arahy.0FWB0U,Arahy.1E9R5B,Arahy.2T470H,Arahy.62AJ6F,Arahy.632XZS,Arahy.657RUG,Arahy.8R729R,Arahy.B1BL2B,Arahy.DD2ABE,Arahy.DEK8Z8,Arahy.EX05TD,Arahy.I65W25,Arahy.IZ1X2W,Arahy.JSL8JQ,Arahy.LH2L98,Arahy.V4BGUX,Arahy.X9RD42,Arahy.Y03563
environmental stress-related elements	ARE	cis-acting regulatory element essential for the anaerobic induction	Arahy.1E9R5B,Arahy.62AJ6F,Arahy.657RUG,Arahy.8R729R,Arahy.B1BL2B,Arahy.DD2ABE,Arahy.DEK8Z8,Arahy.DJ079B,Arahy.EX05TD,Arahy.F3ZCPW,Arahy.G1MIMQ,Arahy.GWW51V,Arahy.JSL8JQ,Arahy.JXS3UT,Arahy.K1SYDF,Arahy.L1HKPT,Arahy.P8HI4P,Arahy.R4HSFZ,Arahy.XY5KEE,Arahy.Y03563,Arahy.ZR07MJ
environmental stress-related elements	TC-rich repeats	cis-acting element involved in defense and stress responsiveness	Arahy.1E9R5B,Arahy.2T470H,Arahy.552ZQ0,Arahy.632XZS,Arahy.657RUG,Arahy.B1BL2B,Arahy.DEK8Z8,Arahy.DJ079B,Arahy.EX05TD,Arahy.F3ZCPW,Arahy.JSL8JQ,Arahy.K1SYDF,Arahy.LH2L98,Arahy.X9RD42,Arahy.ZR07MJ
environmental stress-related elements	LTR	cis-acting element involved in low-temperature responsiveness	Arahy.657RUG,Arahy.DEK8Z8,Arahy.G1MIMQ,Arahy.GWW51V,Arahy.JXS3UT
hormone-responsive elements	ABRE	cis-acting element involved in the abscisic acid responsiveness	Arahy.0FWB0U,Arahy.2T470H,Arahy.50HX4L,Arahy.552ZQ0,Arahy.62AJ6F,Arahy.632XZS,Arahy.657RUG,Arahy.8R729R,Arahy.B1BL2B,Arahy.DEK8Z8,Arahy.F3ZCPW,Arahy.I65W25,Arahy.IZ1X2W,Arahy.JSL8JQ,Arahy.K1SYDF,Arahy.L1HKPT,Arahy.LH2L98,Arahy.P8HI4P,Arahy.R4HSFZ,Arahy.V4BGUX,Arahy.WBWR58,Arahy.X9RD42,Arahy.XY5KEE,Arahy.ZR07MJ
hormone-responsive elements	AuxRR-core	cis-acting regulatory element involved in auxin responsiveness	Arahy.0FWB0U,Arahy.EX05TD,Arahy.LH2L98
hormone-responsive elements	CGTCA-motif	cis-acting regulatory element involved in the MeJA-responsiveness	Arahy.0FWB0U,Arahy.1E9R5B,Arahy.2T470H,Arahy.50HX4L,Arahy.62AJ6F,Arahy.632XZS,Arahy.657RUG,Arahy.DD2ABE,Arahy.DEK8Z8,Arahy.DJ079B,Arahy.F3ZCPW,Arahy.K1SYDF,Arahy.L1HKPT,Arahy.LH2L98,Arahy.P8HI4P,Arahy.WBWR58,Arahy.X9RD42,Arahy.Y03563,Arahy.ZR07MJ
hormone-responsive elements	TGACG-motif	cis-acting regulatory element involved in the MeJA-responsiveness	Arahy.0FWB0U,Arahy.1E9R5B,Arahy.2T470H,Arahy.50HX4L,Arahy.62AJ6F,Arahy.632XZS,Arahy.657RUG,Arahy.DD2ABE,Arahy.DEK8Z8,Arahy.DJ079B,Arahy.F3ZCPW,Arahy.K1SYDF,Arahy.L1HKPT,Arahy.LH2L98,Arahy.P8HI4P,Arahy.WBWR58,Arahy.X9RD42,Arahy.XY5KEE,Arahy.Y03563,Arahy.ZR07MJ
hormone-responsive elements	TCA-element	auxin-responsive element	Arahy.1E9R5B,Arahy.2T470H,Arahy.552ZQ0,Arahy.62AJ6F,Arahy.657RUG,Arahy.B1BL2B,Arahy.DEK8Z8,Arahy.DJ079B,Arahy.F3ZCPW,Arahy.GWW51V,Arahy.JXS3UT,Arahy.K1SYDF,Arahy.WBWR58,Arahy.X9RD42,Arahy.Y03563,Arahy.ZR07MJ
hormone-responsive elements	GARE-motif	gibberellin-responsive element	Arahy.552ZQ0,Arahy.F3ZCPW,Arahy.L1HKPT,Arahy.ZR07MJ
hormone-responsive elements	TGA-element	auxin-responsive element	Arahy.552ZQ0,Arahy.62AJ6F,Arahy.DEK8Z8,Arahy.F3ZCPW,Arahy.G1MIMQ,Arahy.GWW51V,Arahy.JXS3UT,Arahy.K1SYDF,Arahy.L1HKPT,Arahy.P8HI4P,Arahy.ZR07MJ
hormone-responsive elements	P-box	gibberellin-responsive element	Arahy.8R729R,Arahy.I65W25,Arahy.JSL8JQ,Arahy.V4BGUX
hormone-responsive elements	TATC-box	cis-acting element involved in gibberellin-responsiveness	Arahy.632XZS,Arahy.DJ079B,Arahy.P8HI4P,Arahy.Y03563
hormone-responsive elements	TGA-box	part of an auxin-responsive element	Arahy.K1SYDF
light-responsive elements	AE-box	part of a module for light response	Arahy.0FWB0U,Arahy.50HX4L,Arahy.62AJ6F,Arahy.657RUG,Arahy.8R729R,Arahy.DD2ABE,Arahy.DEK8Z8,Arahy.G1MIMQ,Arahy.GWW51V,Arahy.JSL8JQ,Arahy.JXS3UT,Arahy.K1SYDF,Arahy.LH2L98,Arahy.X9RD42,Arahy.XY5KEE
light-responsive elements	Box 4	part of a conserved DNA module involved in light responsiveness	Arahy.0FWB0U,Arahy.1E9R5B,Arahy.2T470H,Arahy.50HX4L,Arahy.552ZQ0,Arahy.62AJ6F,Arahy.632XZS,Arahy.657RUG,Arahy.8R729R,Arahy.B1BL2B,Arahy.DD2ABE,Arahy.DEK8Z8,Arahy.DJ079B,Arahy.F3ZCPW,Arahy.G1MIMQ,Arahy.GWW51V,Arahy.I65W25,Arahy.IZ1X2W,Arahy.JSL8JQ,Arahy.JXS3UT,Arahy.K1SYDF,Arahy.L1HKPT,Arahy.LH2L98,Arahy.P8HI4P,Arahy.R4HSFZ,Arahy.V4BGUX,Arahy.WBWR58,Arahy.X9RD42,Arahy.XY5KEE,Arahy.Y03563,Arahy.ZR0…
light-responsive elements	Box II	part of a light responsive element	Arahy.0FWB0U,Arahy.657RUG,Arahy.8R729R,Arahy.DEK8Z8,Arahy.I65W25,Arahy.JSL8JQ,Arahy.LH2L98,Arahy.V4BGUX
light-responsive elements	G-Box	cis-acting regulatory element involved in light responsiveness	Arahy.0FWB0U,Arahy.50HX4L,Arahy.552ZQ0,Arahy.62AJ6F,Arahy.632XZS,Arahy.8R729R,Arahy.F3ZCPW,Arahy.JSL8JQ,Arahy.K1SYDF,Arahy.LH2L98,Arahy.P8HI4P,Arahy.R4HSFZ,Arahy.X9RD42,Arahy.ZR07MJ
light-responsive elements	G-box	cis-acting regulatory element involved in light responsiveness	Arahy.0FWB0U,Arahy.2T470H,Arahy.552ZQ0,Arahy.62AJ6F,Arahy.632XZS,Arahy.657RUG,Arahy.B1BL2B,Arahy.DEK8Z8,Arahy.F3ZCPW,Arahy.GWW51V,Arahy.I65W25,Arahy.IZ1X2W,Arahy.K1SYDF,Arahy.L1HKPT,Arahy.LH2L98,Arahy.P8HI4P,Arahy.V4BGUX,Arahy.WBWR58,Arahy.X9RD42,Arahy.XY5KEE,Arahy.ZR07MJ
light-responsive elements	GT1-motif	light responsive element	Arahy.0FWB0U,Arahy.1E9R5B,Arahy.2T470H,Arahy.50HX4L,Arahy.552ZQ0,Arahy.62AJ6F,Arahy.657RUG,Arahy.B1BL2B,Arahy.DD2ABE,Arahy.DEK8Z8,Arahy.DJ079B,Arahy.EX05TD,Arahy.F3ZCPW,Arahy.G1MIMQ,Arahy.IZ1X2W,Arahy.JXS3UT,Arahy.L1HKPT,Arahy.P8HI4P,Arahy.R4HSFZ,Arahy.X9RD42,Arahy.Y03563,Arahy.ZR07MJ
light-responsive elements	chs-CMA1a	part of a light responsive element	Arahy.0FWB0U,Arahy.62AJ6F,Arahy.657RUG,Arahy.DEK8Z8,Arahy.IZ1X2W
light-responsive elements	AT1-motif	Solanum tuberosum part of a light responsive module	Arahy.1E9R5B,Arahy.2T470H,Arahy.552ZQ0,Arahy.657RUG,Arahy.8R729R,Arahy.B1BL2B,Arahy.F3ZCPW,Arahy.IZ1X2W,Arahy.V4BGUX,Arahy.WBWR58,Arahy.X9RD42,Arahy.XY5KEE,Arahy.ZR07MJ
light-responsive elements	TCT-motif	part of a light responsive element	Arahy.1E9R5B,Arahy.2T470H,Arahy.50HX4L,Arahy.62AJ6F,Arahy.657RUG,Arahy.8R729R,Arahy.B1BL2B,Arahy.DEK8Z8,Arahy.DJ079B,Arahy.I65W25,Arahy.IZ1X2W,Arahy.JSL8JQ,Arahy.JXS3UT,Arahy.K1SYDF,Arahy.L1HKPT,Arahy.LH2L98,Arahy.P8HI4P,Arahy.R4HSFZ,Arahy.V4BGUX,Arahy.WBWR58,Arahy.X9RD42,Arahy.XY5KEE,Arahy.Y03563
light-responsive elements	CAG-motif	part of a light response element	Arahy.552ZQ0
light-responsive elements	I-box	part of a light responsive element	Arahy.62AJ6F,Arahy.F3ZCPW,Arahy.GWW51V,Arahy.L1HKPT,Arahy.P8HI4P,Arahy.Y03563,Arahy.ZR07MJ
light-responsive elements	LAMP-element	part of a light responsive element	Arahy.62AJ6F,Arahy.632XZS,Arahy.IZ1X2W,Arahy.K1SYDF,Arahy.P8HI4P
light-responsive elements	MRE	MYB binding site involved in light responsiveness	Arahy.62AJ6F,Arahy.632XZS,Arahy.DJ079B,Arahy.JXS3UT,Arahy.P8HI4P,Arahy.R4HSFZ,Arahy.XY5KEE
light-responsive elements	TCCC-motif	part of a light responsive element	Arahy.632XZS,Arahy.8R729R,Arahy.DD2ABE,Arahy.F3ZCPW,Arahy.G1MIMQ,Arahy.JSL8JQ,Arahy.JXS3UT,Arahy.R4HSFZ,Arahy.ZR07MJ
light-responsive elements	ATC-motif	part of a conserved DNA module involved in light responsiveness	Arahy.657RUG,Arahy.DD2ABE,Arahy.DEK8Z8,Arahy.I65W25,Arahy.V4BGUX,Arahy.WBWR58,Arahy.XY5KEE
light-responsive elements	GATA-motif	part of a light responsive element	Arahy.657RUG,Arahy.8R729R,Arahy.DEK8Z8,Arahy.F3ZCPW,Arahy.G1MIMQ,Arahy.GWW51V,Arahy.JSL8JQ,Arahy.JXS3UT,Arahy.K1SYDF,Arahy.L1HKPT,Arahy.P8HI4P,Arahy.R4HSFZ,Arahy.ZR07MJ
light-responsive elements	chs-CMA2a	part of a light responsive element	Arahy.657RUG,Arahy.DEK8Z8
light-responsive elements	ACE	cis-acting element involved in light responsiveness	Arahy.8R729R,Arahy.F3ZCPW,Arahy.JSL8JQ,Arahy.P8HI4P,Arahy.R4HSFZ,Arahy.ZR07MJ
light-responsive elements	GA-motif	part of a light responsive element	Arahy.8R729R,Arahy.DD2ABE,Arahy.G1MIMQ,Arahy.IZ1X2W,Arahy.JSL8JQ,Arahy.JXS3UT
light-responsive elements	Gap-box	part of a light responsive element	Arahy.8R729R,Arahy.G1MIMQ,Arahy.JSL8JQ,Arahy.JXS3UT,Arahy.R4HSFZ
light-responsive elements	ATCT-motif	part of a conserved DNA module involved in light responsiveness	Arahy.B1BL2B,Arahy.DEK8Z8,Arahy.GWW51V,Arahy.P8HI4P,Arahy.R4HSFZ
light-responsive elements	Sp1	light responsive element	Arahy.GWW51V,Arahy.L1HKPT,Arahy.XY5KEE
light-responsive elements	AAAC-motif	light responsive element	Arahy.Y03563
light-responsive elements	chs-Unit 1 m1	part of a light responsive element	Arahy.I65W25,Arahy.V4BGUX
light-responsive elements	GTGGC-motif	part of a light response element	Arahy.V4BGUX
promoter-related elements	AT-rich sequence	element for maximal elicitor-mediated activation (2copies)	Arahy.0FWB0U, Arahy.IZ1X2W, Arahy.LH2L98
promoter-related elements	CAAT-box	common cis-acting element in promoter and enhancer regions	Arahy.0FWB0U,Arahy.1E9R5B,Arahy.2T470H,Arahy.50HX4L,Arahy.552ZQ0,Arahy.62AJ6F,Arahy.632XZS,Arahy.657RUG,Arahy.8R729R,Arahy.B1BL2B,Arahy.DD2ABE,Arahy.DEK8Z8,Arahy.DJ079B,Arahy.EX05TD,Arahy.F3ZCPW,Arahy.G1MIMQ,Arahy.GWW51V,Arahy.I65W25,Arahy.IZ1X2W,Arahy.JSL8JQ,Arahy.JXS3UT,Arahy.K1SYDF,Arahy.L1HKPT,Arahy.LH2L98,Arahy.P8HI4P,Arahy.R4HSFZ,Arahy.V4BGUX,Arahy.WBWR58,Arahy.X9RD42,Arahy.XY5KEE,Arahy.Y03…
promoter-related elements	TATA-box	core promoter element around -30 of transcription start	Arahy.0FWB0U,Arahy.1E9R5B,Arahy.2T470H,Arahy.50HX4L,Arahy.552ZQ0,Arahy.62AJ6F,Arahy.632XZS,Arahy.657RUG,Arahy.8R729R,Arahy.B1BL2B,Arahy.DD2ABE,Arahy.DEK8Z8,Arahy.DJ079B,Arahy.EX05TD,Arahy.F3ZCPW,Arahy.G1MIMQ,Arahy.GWW51V,Arahy.I65W25,Arahy.IZ1X2W,Arahy.JSL8JQ,Arahy.JXS3UT,Arahy.K1SYDF,Arahy.L1HKPT,Arahy.LH2L98,Arahy.P8HI4P,Arahy.R4HSFZ,Arahy.V4BGUX,Arahy.WBWR58,Arahy.X9RD42,Arahy.XY5KEE,Arahy.Y03…
site-binding related elements	CCAAT-box	MYBHv1 binding site	Arahy.1E9R5B,Arahy.50HX4L,Arahy.B1BL2B,Arahy.DJ079B,Arahy.I65W25,Arahy.IZ1X2W,Arahy.L1HKPT,Arahy.P8HI4P,Arahy.R4HSFZ,Arahy.V4BGUX
site-binding related elements	MBSI	MYB binding site involved in flavonoid biosynthetic genes regulation	Arahy.50HX4L,Arahy.G1MIMQ,Arahy.R4HSFZ
site-binding related elements	AT-rich element	binding site of AT-rich DNA binding protein (ATBP-1)	Arahy.657RUG,Arahy.DEK8Z8,Arahy.L1HKPT,Arahy.Y03563
site-binding related elements	HD-Zip 3	protein binding site	Arahy.IZ1X2W
site-binding related elements	Box III	protein binding site	Arahy.G1MIMQ,Arahy.JXS3UT,Arahy.L1HKPT,Arahy.XY5KEE
site-binding related elements	3-AF3 binding site	part of a conserved DNA module array (CMA3)	Arahy.632XZS,Arahy.JXS3UT,Arahy.K1SYDF
other elements	/	uknown	Arahy.0FWB0U,Arahy.1E9R5B,Arahy.2T470H,Arahy.50HX4L,Arahy.552ZQ0,Arahy.62AJ6F,Arahy.632XZS,Arahy.657RUG,Arahy.8R729R,Arahy.B1BL2B,Arahy.DD2ABE,Arahy.DEK8Z8,Arahy.DJ079B,Arahy.EX05TD,Arahy.F3ZCPW,Arahy.G1MIMQ,Arahy.GWW51V,Arahy.I65W25,Arahy.IZ1X2W,Arahy.JSL8JQ,Arahy.JXS3UT,Arahy.K1SYDF,Arahy.L1HKPT,Arahy.LH2L98,Arahy.P8HI4P,Arahy.R4HSFZ,Arahy.V4BGUX,Arahy.WBWR58,Arahy.X9RD42,Arahy.XY5KEE,Arahy.Y03…
other elements	AAGAA-motif	uknown	Arahy.0FWB0U,Arahy.552ZQ0,Arahy.657RUG,Arahy.8R729R,Arahy.DD2ABE,Arahy.DEK8Z8,Arahy.DJ079B,Arahy.EX05TD,Arahy.F3ZCPW,Arahy.GWW51V,Arahy.I65W25,Arahy.IZ1X2W,Arahy.JSL8JQ,Arahy.L1HKPT,Arahy.LH2L98,Arahy.R4HSFZ,Arahy.V4BGUX,Arahy.WBWR58,Arahy.XY5KEE,Arahy.Y03563,Arahy.ZR07MJ
other elements	AT~TATA-box	uknown	Arahy.0FWB0U,Arahy.1E9R5B,Arahy.2T470H,Arahy.50HX4L,Arahy.552ZQ0,Arahy.62AJ6F,Arahy.632XZS,Arahy.657RUG,Arahy.8R729R,Arahy.B1BL2B,Arahy.DD2ABE,Arahy.DEK8Z8,Arahy.DJ079B,Arahy.EX05TD,Arahy.F3ZCPW,Arahy.G1MIMQ,Arahy.GWW51V,Arahy.I65W25,Arahy.IZ1X2W,Arahy.JSL8JQ,Arahy.JXS3UT,Arahy.K1SYDF,Arahy.L1HKPT,Arahy.LH2L98,Arahy.P8HI4P,Arahy.R4HSFZ,Arahy.V4BGUX,Arahy.WBWR58,Arahy.X9RD42,Arahy.XY5KEE,Arahy.Y03…
other elements	ERE	uknown	Arahy.0FWB0U,Arahy.1E9R5B,Arahy.2T470H,Arahy.50HX4L,Arahy.552ZQ0,Arahy.62AJ6F,Arahy.632XZS,Arahy.657RUG,Arahy.B1BL2B,Arahy.DD2ABE,Arahy.DEK8Z8,Arahy.EX05TD,Arahy.F3ZCPW,Arahy.G1MIMQ,Arahy.GWW51V,Arahy.I65W25,Arahy.IZ1X2W,Arahy.JSL8JQ,Arahy.K1SYDF,Arahy.L1HKPT,Arahy.P8HI4P,Arahy.R4HSFZ,Arahy.V4BGUX,Arahy.WBWR58,Arahy.X9RD42,Arahy.XY5KEE,Arahy.ZR07MJ
other elements	MYB	uknown	Arahy.0FWB0U,Arahy.1E9R5B,Arahy.2T470H,Arahy.50HX4L,Arahy.552ZQ0,Arahy.62AJ6F,Arahy.632XZS,Arahy.657RUG,Arahy.8R729R,Arahy.B1BL2B,Arahy.DEK8Z8,Arahy.DJ079B,Arahy.EX05TD,Arahy.F3ZCPW,Arahy.G1MIMQ,Arahy.GWW51V,Arahy.I65W25,Arahy.IZ1X2W,Arahy.JSL8JQ,Arahy.JXS3UT,Arahy.L1HKPT,Arahy.LH2L98,Arahy.P8HI4P,Arahy.R4HSFZ,Arahy.V4BGUX,Arahy.WBWR58,Arahy.X9RD42,Arahy.XY5KEE,Arahy.Y03563,Arahy.ZR07MJ
other elements	MYC	uknown	Arahy.0FWB0U,Arahy.1E9R5B,Arahy.2T470H,Arahy.50HX4L,Arahy.552ZQ0,Arahy.62AJ6F,Arahy.632XZS,Arahy.8R729R,Arahy.B1BL2B,Arahy.DD2ABE,Arahy.DJ079B,Arahy.EX05TD,Arahy.G1MIMQ,Arahy.GWW51V,Arahy.I65W25,Arahy.IZ1X2W,Arahy.JSL8JQ,Arahy.JXS3UT,Arahy.K1SYDF,Arahy.L1HKPT,Arahy.LH2L98,Arahy.R4HSFZ,Arahy.V4BGUX,Arahy.WBWR58,Arahy.X9RD42,Arahy.XY5KEE,Arahy.Y03563
other elements	Myb	uknown	Arahy.0FWB0U,Arahy.1E9R5B,Arahy.2T470H,Arahy.62AJ6F,Arahy.632XZS,Arahy.657RUG,Arahy.8R729R,Arahy.B1BL2B,Arahy.DD2ABE,Arahy.DEK8Z8,Arahy.DJ079B,Arahy.EX05TD,Arahy.I65W25,Arahy.IZ1X2W,Arahy.JSL8JQ,Arahy.JXS3UT,Arahy.K1SYDF,Arahy.L1HKPT,Arahy.LH2L98,Arahy.V4BGUX,Arahy.WBWR58,Arahy.X9RD42,Arahy.XY5KEE,Arahy.Y03563
other elements	TCA	uknown	Arahy.0FWB0U,Arahy.632XZS,Arahy.8R729R,Arahy.DD2ABE,Arahy.I65W25,Arahy.JXS3UT,Arahy.LH2L98,Arahy.657RUG,Arahy.V4BGUX,Arahy.WBWR58,Arahy.Y03563,Arahy.DEK8Z8,Arahy.F3ZCPW,Arahy.P8HI4P,Arahy.ZR07MJ
other elements	Unnamed__4	uknown	Arahy.0FWB0U,Arahy.1E9R5B,Arahy.2T470H,Arahy.50HX4L,Arahy.552ZQ0,Arahy.62AJ6F,Arahy.632XZS,Arahy.657RUG,Arahy.8R729R,Arahy.B1BL2B,Arahy.DD2ABE,Arahy.DEK8Z8,Arahy.DJ079B,Arahy.F3ZCPW,Arahy.G1MIMQ,Arahy.GWW51V,Arahy.I65W25,Arahy.IZ1X2W,Arahy.JSL8JQ,Arahy.JXS3UT,Arahy.K1SYDF,Arahy.L1HKPT,Arahy.LH2L98,Arahy.P8HI4P,Arahy.R4HSFZ,Arahy.V4BGUX,Arahy.WBWR58,Arahy.X9RD42,Arahy.XY5KEE,Arahy.Y03563,Arahy.ZR0…
other elements	W box	uknown	Arahy.0FWB0U,Arahy.1E9R5B,Arahy.50HX4L,Arahy.62AJ6F,Arahy.657RUG,Arahy.8R729R,Arahy.DEK8Z8,Arahy.EX05TD,Arahy.G1MIMQ,Arahy.I65W25,Arahy.JSL8JQ,Arahy.JXS3UT,Arahy.K1SYDF,Arahy.LH2L98,Arahy.P8HI4P,Arahy.R4HSFZ,Arahy.V4BGUX
other elements	as-1	uknown	Arahy.0FWB0U,Arahy.1E9R5B,Arahy.2T470H,Arahy.50HX4L,Arahy.62AJ6F,Arahy.632XZS,Arahy.657RUG,Arahy.DD2ABE,Arahy.DEK8Z8,Arahy.DJ079B,Arahy.F3ZCPW,Arahy.K1SYDF,Arahy.L1HKPT,Arahy.LH2L98,Arahy.P8HI4P,Arahy.WBWR58,Arahy.X9RD42,Arahy.Y03563,Arahy.ZR07MJ
other elements	AC-II	uknown	Arahy.1E9R5B,Arahy.2T470H,Arahy.B1BL2B,Arahy.EX05TD
other elements	AP-1	uknown	Arahy.1E9R5B,Arahy.2T470H,Arahy.50HX4L,Arahy.62AJ6F,Arahy.B1BL2B,Arahy.EX05TD,Arahy.K1SYDF,Arahy.X9RD42
other elements	MYB recognition site	uknown	Arahy.1E9R5B,Arahy.50HX4L,Arahy.B1BL2B,Arahy.DJ079B,Arahy.I65W25,Arahy.IZ1X2W,Arahy.L1HKPT,Arahy.P8HI4P,Arahy.R4HSFZ,Arahy.V4BGUX
other elements	MYB-like sequence	uknown	Arahy.1E9R5B,Arahy.2T470H,Arahy.50HX4L,Arahy.552ZQ0,Arahy.62AJ6F,Arahy.657RUG,Arahy.B1BL2B,Arahy.DEK8Z8,Arahy.DJ079B,Arahy.F3ZCPW,Arahy.G1MIMQ,Arahy.GWW51V,Arahy.IZ1X2W,Arahy.JXS3UT,Arahy.P8HI4P,Arahy.X9RD42,Arahy.XY5KEE,Arahy.Y03563,Arahy.ZR07MJ
other elements	Myb-binding site	uknown	Arahy.1E9R5B,Arahy.2T470H,Arahy.50HX4L,Arahy.552ZQ0,Arahy.632XZS,Arahy.657RUG,Arahy.B1BL2B,Arahy.DEK8Z8,Arahy.EX05TD,Arahy.F3ZCPW,Arahy.L1HKPT,Arahy.P8HI4P,Arahy.R4HSFZ,Arahy.WBWR58,Arahy.X9RD42,Arahy.ZR07MJ
other elements	TATA	uknown	Arahy.1E9R5B,Arahy.552ZQ0,Arahy.62AJ6F,Arahy.657RUG,Arahy.8R729R,Arahy.B1BL2B,Arahy.DD2ABE,Arahy.DEK8Z8,Arahy.DJ079B,Arahy.EX05TD,Arahy.F3ZCPW,Arahy.G1MIMQ,Arahy.IZ1X2W,Arahy.JXS3UT,Arahy.K1SYDF,Arahy.L1HKPT,Arahy.LH2L98,Arahy.WBWR58,Arahy.X9RD42,Arahy.XY5KEE,Arahy.Y03563,Arahy.ZR07MJ
other elements	WRE3	uknown	Arahy.1E9R5B,Arahy.2T470H,Arahy.552ZQ0,Arahy.657RUG,Arahy.B1BL2B,Arahy.DEK8Z8,Arahy.GWW51V,Arahy.I65W25,Arahy.K1SYDF,Arahy.L1HKPT,Arahy.P8HI4P,Arahy.V4BGUX,Arahy.X9RD42,Arahy.Y03563
other elements	WUN-motif	uknown	Arahy.1E9R5B,Arahy.50HX4L,Arahy.552ZQ0,Arahy.632XZS,Arahy.657RUG,Arahy.8R729R,Arahy.B1BL2B,Arahy.DD2ABE,Arahy.DEK8Z8,Arahy.EX05TD,Arahy.G1MIMQ,Arahy.GWW51V,Arahy.JSL8JQ,Arahy.L1HKPT,Arahy.LH2L98,Arahy.P8HI4P,Arahy.XY5KEE
other elements	ABRE3a	uknown	Arahy.2T470H,Arahy.552ZQ0,Arahy.62AJ6F,Arahy.657RUG,Arahy.B1BL2B,Arahy.DEK8Z8,Arahy.F3ZCPW,Arahy.I65W25,Arahy.IZ1X2W,Arahy.K1SYDF,Arahy.P8HI4P,Arahy.V4BGUX,Arahy.ZR07MJ
other elements	ABRE4	uknown	Arahy.2T470H,Arahy.552ZQ0,Arahy.62AJ6F,Arahy.657RUG,Arahy.B1BL2B,Arahy.DEK8Z8,Arahy.F3ZCPW,Arahy.I65W25,Arahy.IZ1X2W,Arahy.K1SYDF,Arahy.P8HI4P,Arahy.V4BGUX,Arahy.ZR07MJ
other elements	F-box	uknown	Arahy.50HX4L,Arahy.DEK8Z8,Arahy.EX05TD,Arahy.LH2L98
other elements	STRE	uknown	Arahy.50HX4L,Arahy.552ZQ0,Arahy.62AJ6F,Arahy.657RUG,Arahy.8R729R,Arahy.DEK8Z8,Arahy.G1MIMQ,Arahy.GWW51V,Arahy.I65W25,Arahy.JSL8JQ,Arahy.JXS3UT,Arahy.K1SYDF,Arahy.LH2L98,Arahy.P8HI4P,Arahy.V4BGUX
other elements	Unnamed__1	uknown	Arahy.50HX4L,Arahy.552ZQ0,Arahy.62AJ6F,Arahy.632XZS,Arahy.657RUG,Arahy.8R729R,Arahy.DEK8Z8,Arahy.GWW51V,Arahy.I65W25,Arahy.JXS3UT,Arahy.L1HKPT,Arahy.P8HI4P,Arahy.V4BGUX,Arahy.WBWR58,Arahy.X9RD42,Arahy.XY5KEE
other elements	Unnamed__2	uknown	Arahy.552ZQ0,Arahy.GWW51V,Arahy.I65W25,Arahy.V4BGUX
other elements	Unnamed__6	uknown	Arahy.552ZQ0,Arahy.632XZS,Arahy.DJ079B,Arahy.G1MIMQ,Arahy.I65W25,Arahy.JXS3UT,Arahy.V4BGUX,Arahy.WBWR58,Arahy.Y03563
other elements	box S	uknown	Arahy.552ZQ0,Arahy.657RUG,Arahy.DD2ABE,Arahy.DEK8Z8,Arahy.L1HKPT
other elements	CARE	uknown	Arahy.657RUG,Arahy.DD2ABE,Arahy.DEK8Z8,Arahy.P8HI4P,Arahy.R4HSFZ
other elements	DRE core	uknown	Arahy.657RUG,Arahy.DEK8Z8,Arahy.G1MIMQ
other elements	Myc	uknown	Arahy.632XZS,Arahy.657RUG,Arahy.8R729R,Arahy.DEK8Z8,Arahy.F3ZCPW,Arahy.I65W25,Arahy.JSL8JQ,Arahy.JXS3UT,Arahy.R4HSFZ,Arahy.WBWR58,Arahy.XY5KEE,Arahy.ZR07MJ
other elements	CTAG-motif	uknown	Arahy.DD2ABE
other elements	AC-I	uknown	Arahy.F3ZCPW,Arahy.P8HI4P,Arahy.ZR07MJ
other elements	AT~ABRE	uknown	Arahy.F3ZCPW,Arahy.ZR07MJ
other elements	DRE1	uknown	Arahy.GWW51V
other elements	NON	uknown	Arahy.GWW51V,Arahy.P8HI4P
other elements	dOCT	uknown	Arahy.L1HKPT
